# Supplementary material
Source: PubMed Central journal article supplement (PMC9361478)

**Supplementary Table S1.** *Quadrivariate Model-Fitting Results*

|                                                                      | $\Delta\chi^2$ | df  | <i>p</i> -value |
|----------------------------------------------------------------------|----------------|-----|-----------------|
| I. Full ACE model                                                    |                | 96  |                 |
| II. Model I with all C parameters constrained to zero.               | 4.0730         | 116 | > 0.99          |
| III. Model II with all parameters equated across sex                 | 27.2769        | 136 | 0.13            |
| IV. Model III with path a12 constrained to zero                      | 0.05958        | 137 | 0.81            |
| V. Model IV with paths <i>e23</i> and <i>e24</i> constrained to zero | 2.31697        | 139 | 0.31            |

*Note.* Nested models were compared using the Satorra-Bentler scaled Chi-square difference test.

Full Sample

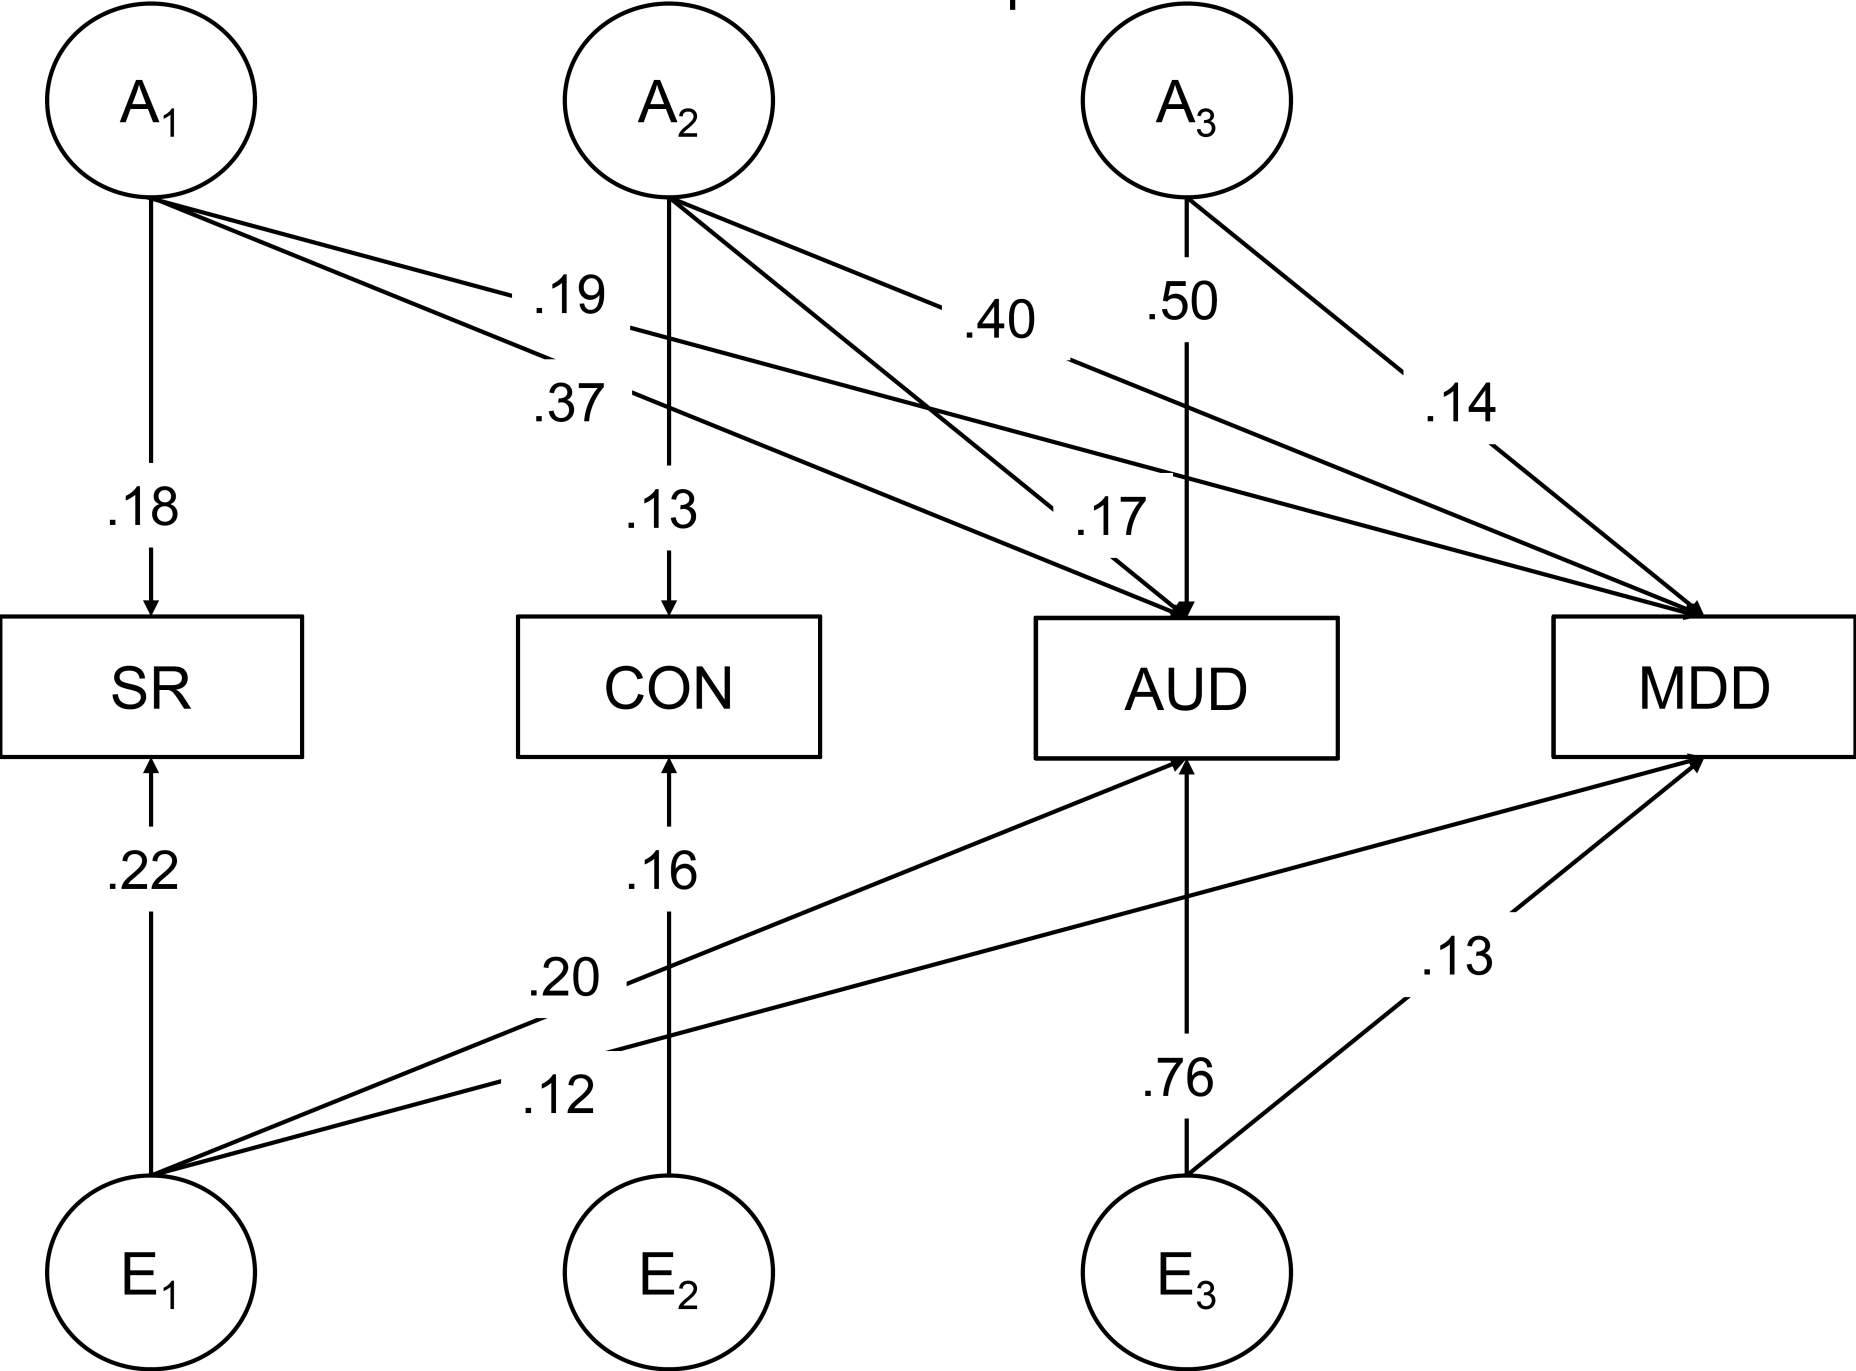

Females

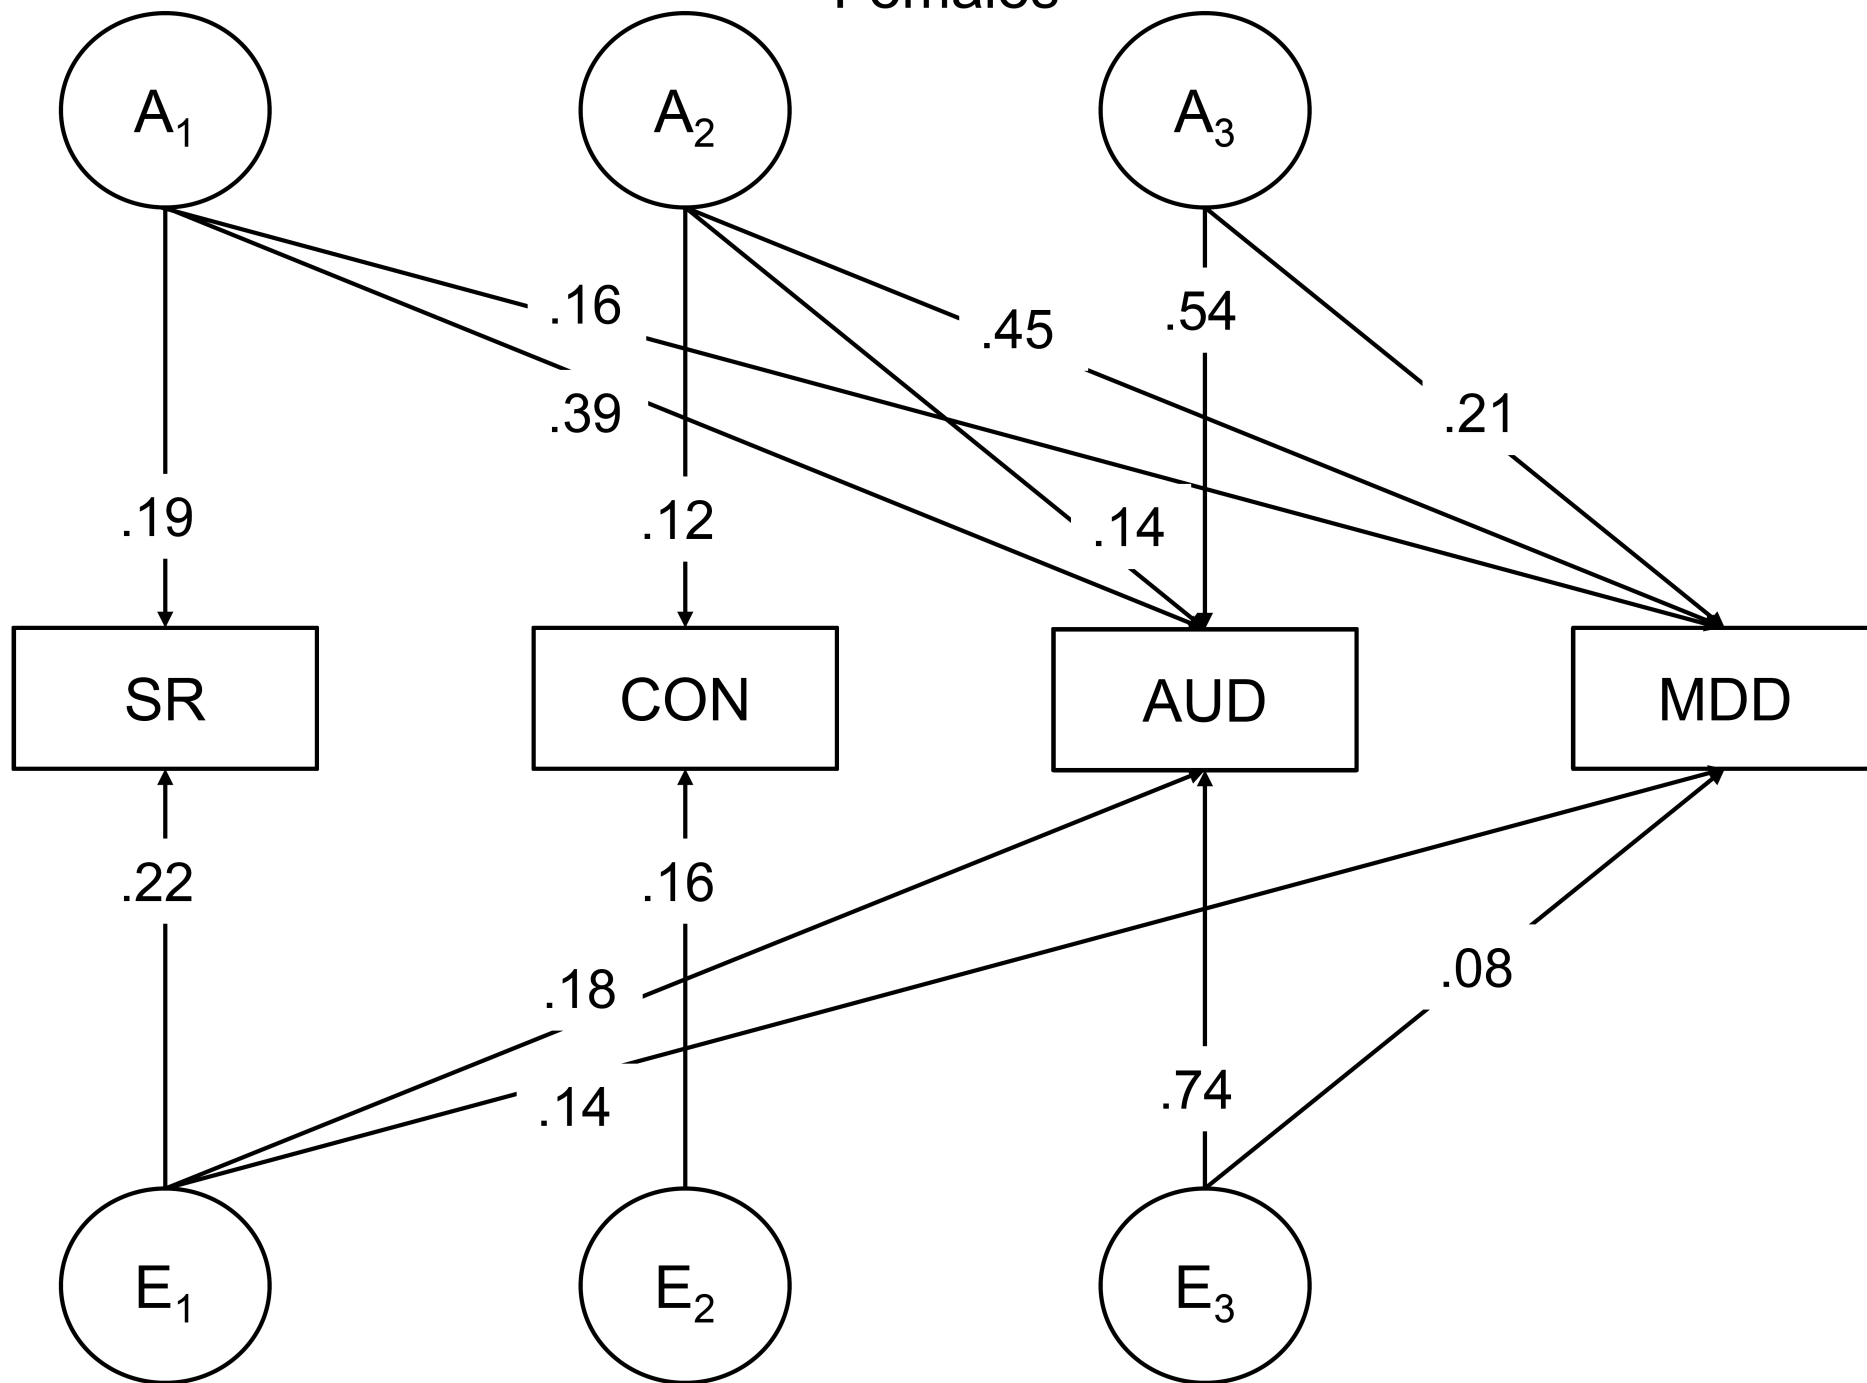

Males

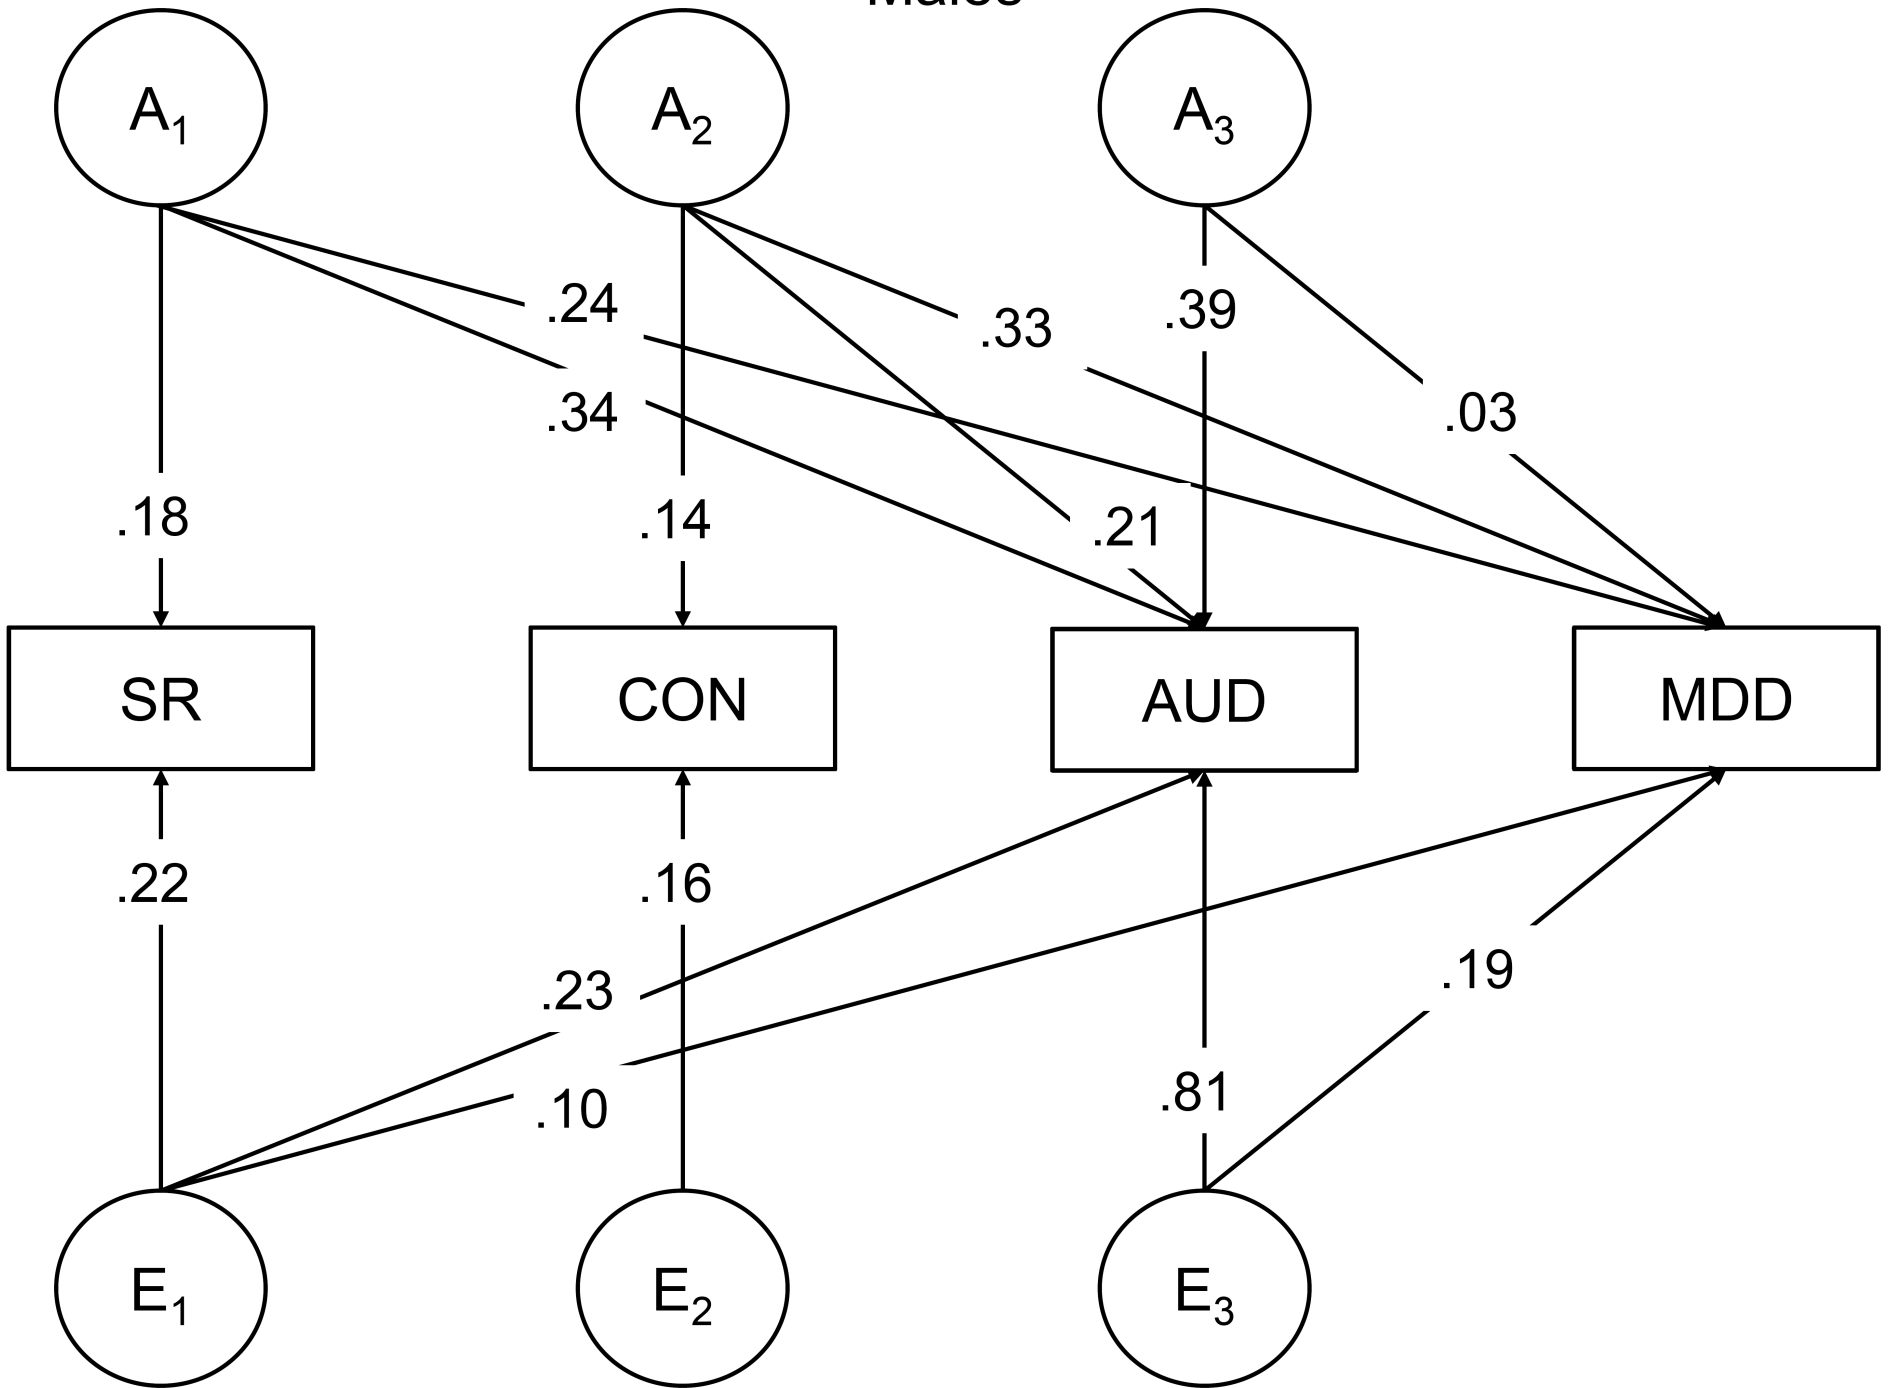

Supplement: NIHMS1826915-supplement-Supplementary_Material.pdf [file NIHMS1826915-supplement-Supplementary_Material.pdf]
